# Supplementary material for: An anti-freeze fluorescent organogel with rapid shape-forming properties for constructing artificial light harvesting systems used in extremely cold environments
Source: Royal Society of Chemistry journal article supplement (doi:10.1039/d3sm01331f), 2023-12-13
Supplement: d3sm01331f2.pdf [file d3sm01331f2.pdf]

## SUPPORTING INFORMATION

### **An anti-freeze fluorescent organogel with rapid shape-forming for constructing artificial light harvesting systems used in extremely cold environments**

Xinxian Ma,<sup>#\*</sup> Jiahong Tang,<sup>#</sup> Tianqi Ren, Jiali Zhang, Jiuzhi Wei, Yuchua Liang, Juan Zhang, Enke Feng, Xinning Han

*Key Laboratory of Green Catalytic Materials and Technology of Ningxia, Ningxia Normal University, Guyuan 756000, China. E-mail: maxinxian@163.com*

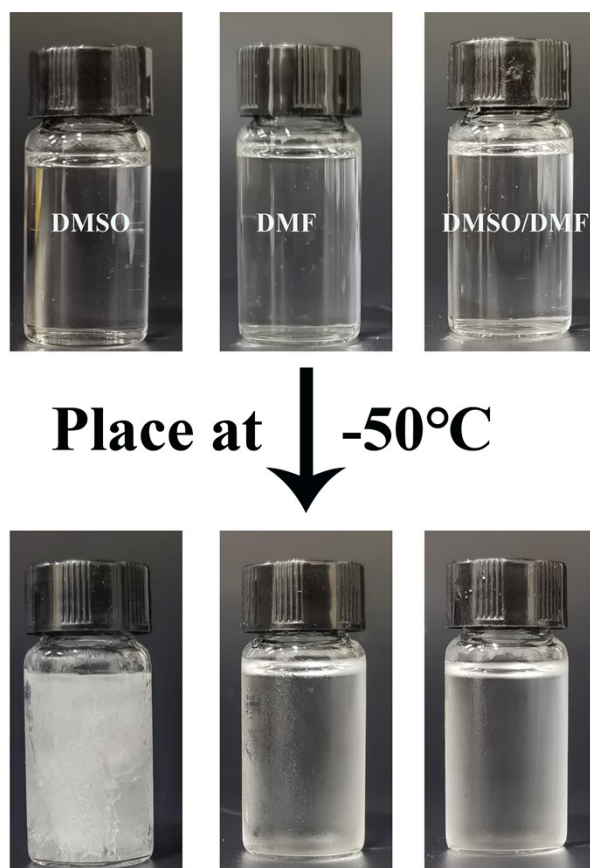

**Fig. S1.** Various solvent systems are placed at -50 °C for a period of time

### **Preparation method of dry gel**

The obtained gel sample was soaked in anhydrous ethanol for a while and placed in a constant temperature oven at 70 °C for seven days, and the xerogel required for SEM was successfully prepared.

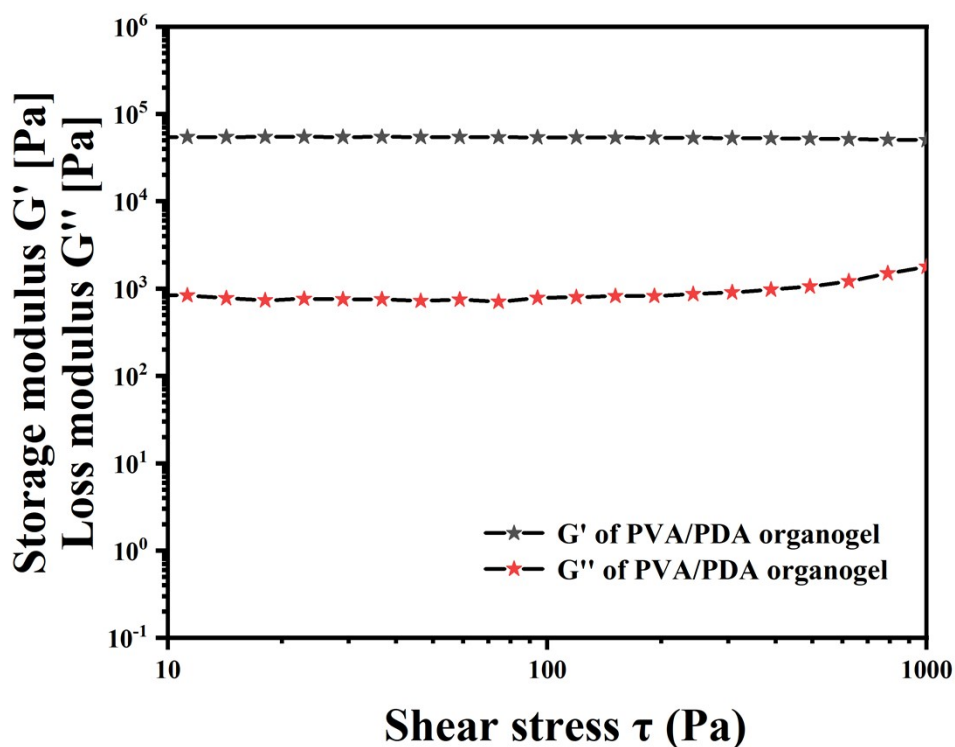

**Fig. S2.** Frequency dependence of  $G'$  (storage modulus) and  $G''$  (loss modulus) for PVA/PDA organogel at different Shear stress. Condition: 68 rad s<sup>-1</sup> frequency, 10Hz constant frequency.

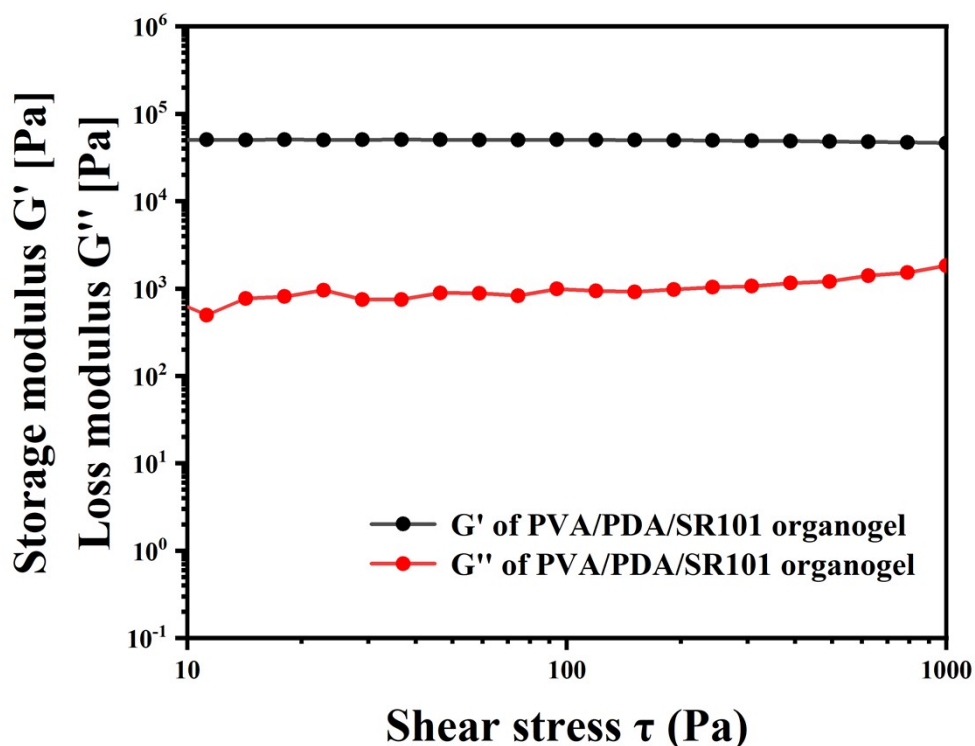

**Fig. S3.** Frequency dependence of  $G'$  (storage modulus) and  $G''$  (loss modulus) for PVA/PDA/SR101 organogel at different Shear stress. Condition: 68 rad s<sup>-1</sup> frequency, 10Hz constant frequency.

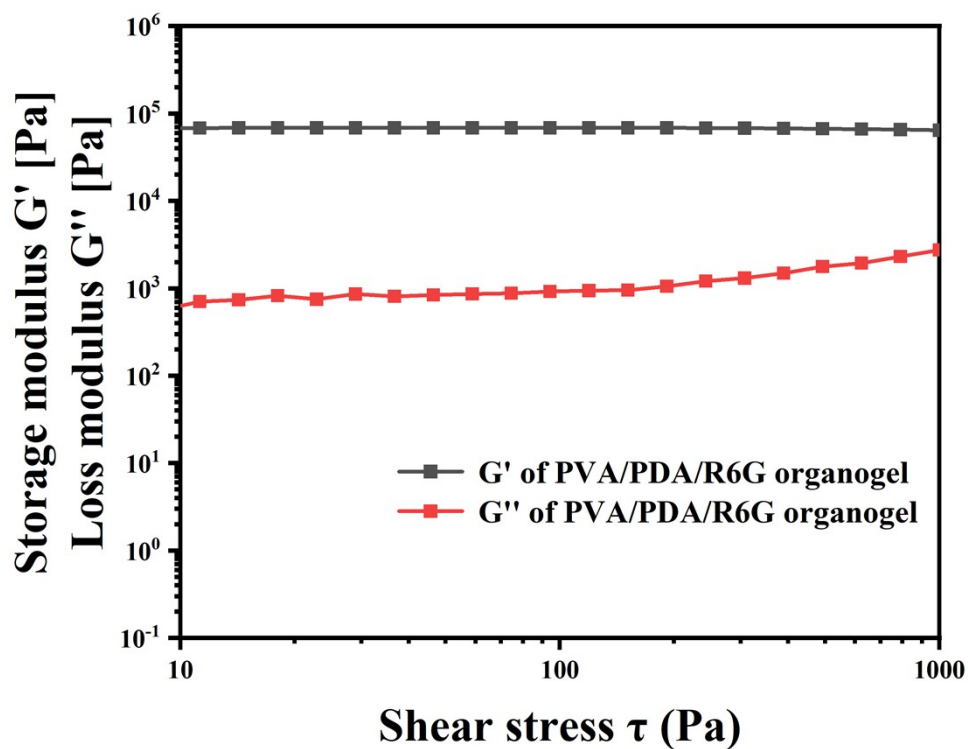

**Fig. S4.** Frequency dependence of  $G'$  (storage modulus) and  $G''$  (loss modulus) for PVA/PDA/R6G organogel at different Shear stress. Condition: 68 rad s<sup>-1</sup> frequency, 10Hz constant frequency.

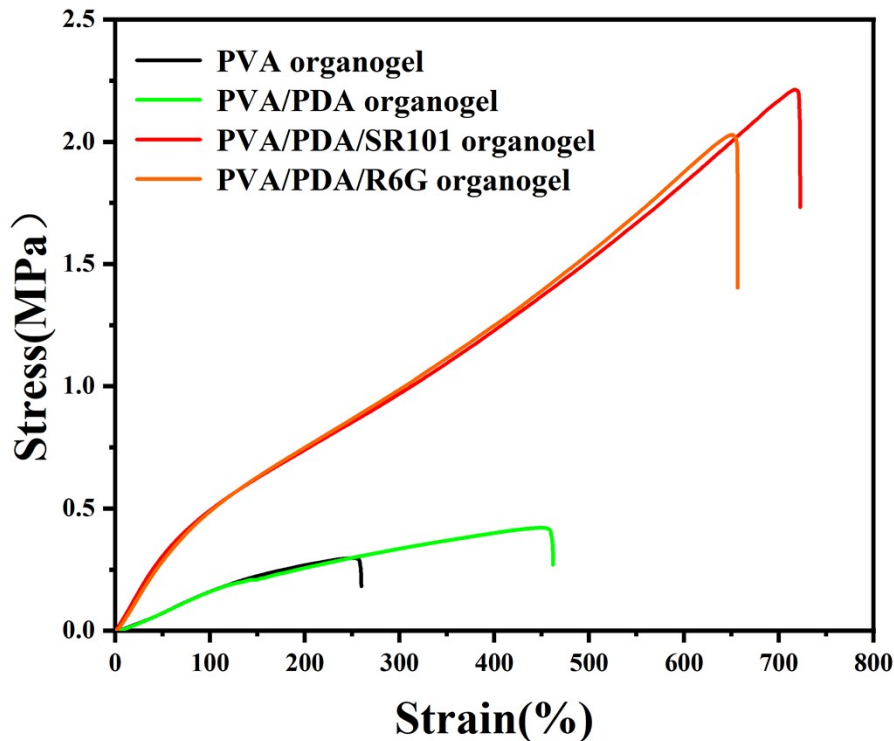

**Fig. S5.** Tensile stress–strain curves of four organogels at room temperature.

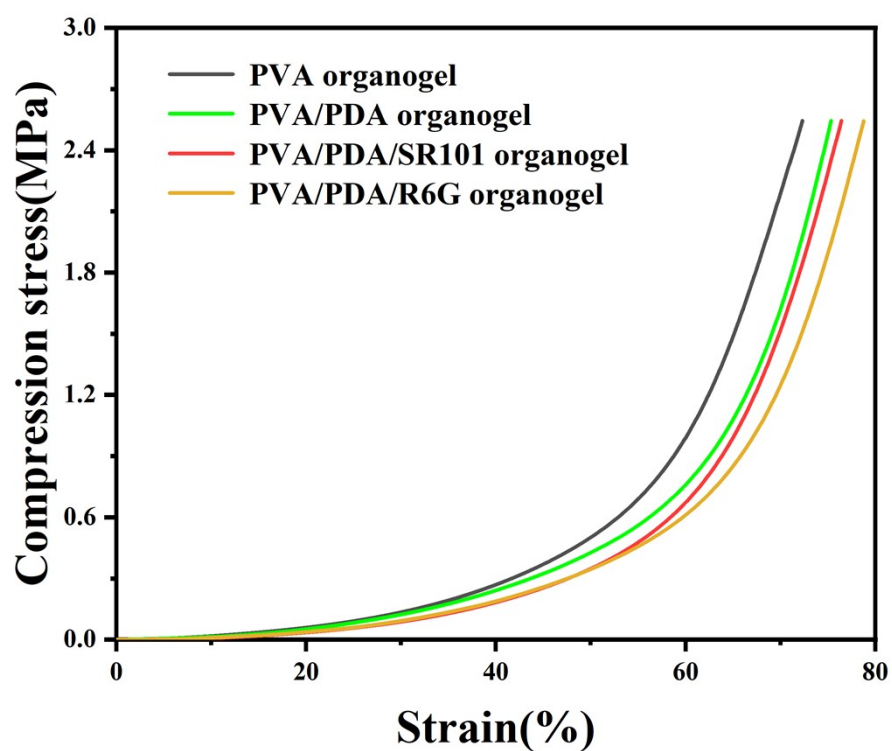

**Fig. S6** Compression stress–strain curves of two organogels at room temperature.

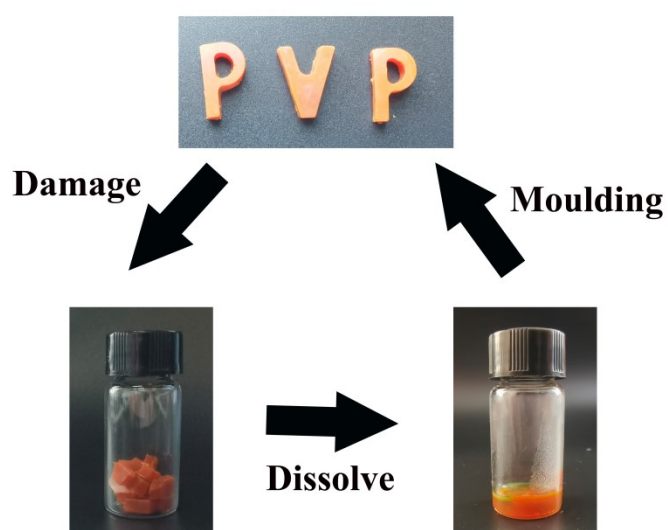

**Fig. S7.** Photos of the recyclability of PVA/PDA organogel

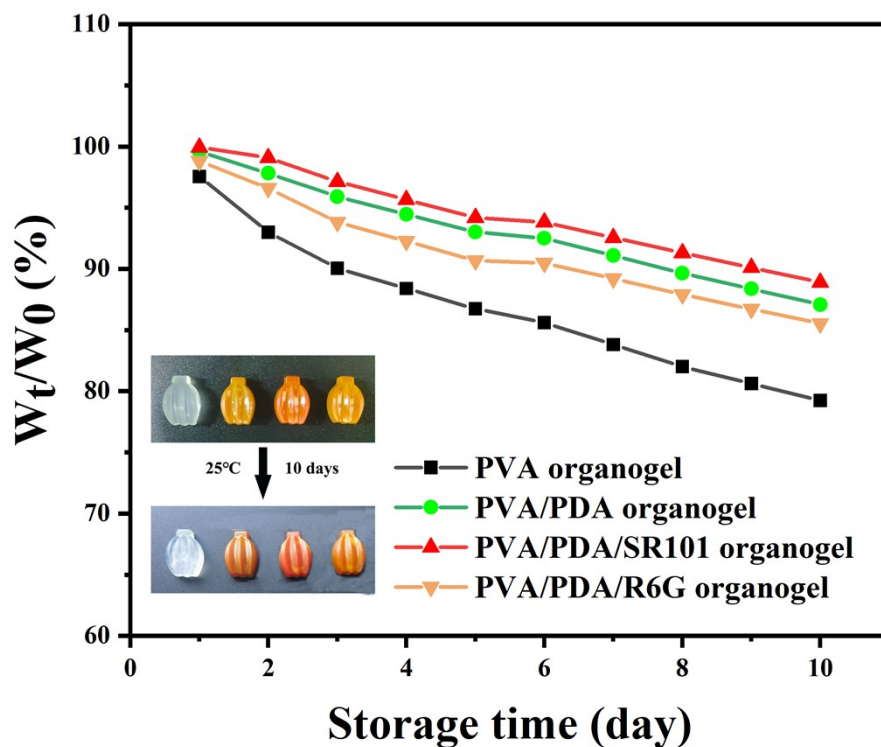

**Fig. S8.** Line chart of residual weight of organogels over time. Inset: Photographs of the organogels was placed at 25 °C for the first and tenth day.

The water retention ratio was calculated by the following equation:

$$\text{Water retention ratio (\%)} = W_t/W_0 \times 100\%;$$

Where  $W_0$  is the initial quality of the organogels and  $W_t$  is the quality of the organogels after various storage days.

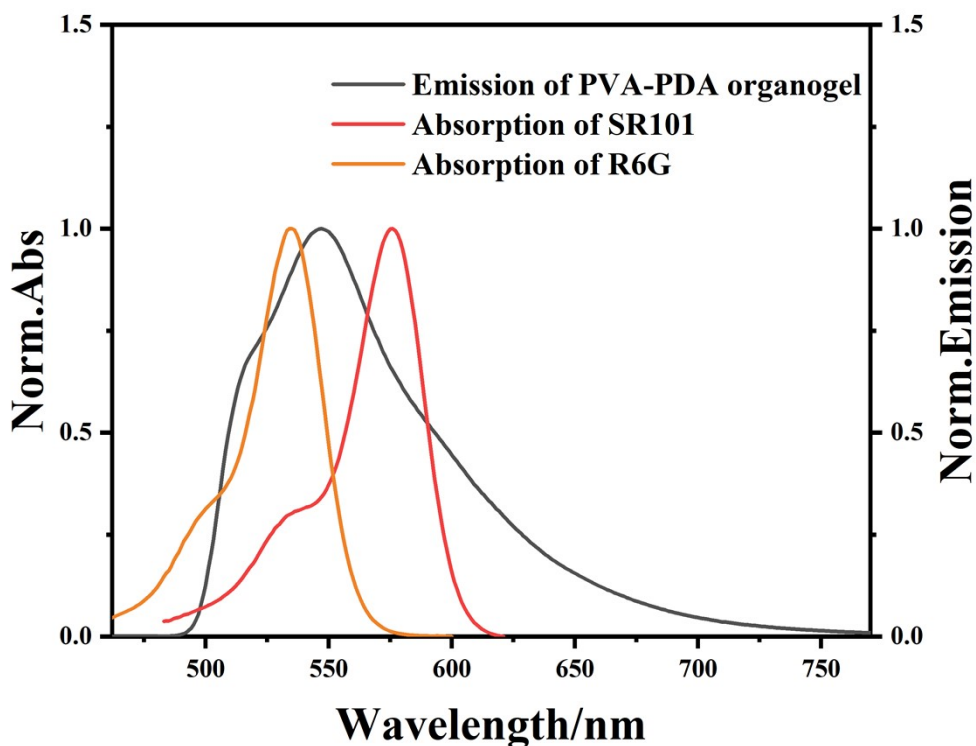

**Fig. S9.** Normalised emission spectrum of PVA/PDA organogel ( $\lambda_{\text{ex}} = 357 \text{ nm}$ ), absorption spectrum of SR101 ( $[\text{SR101}] = 1 \times 10^{-5} \text{ mol}\cdot\text{L}^{-1}$ ) and the absorption spectrum of R6G ( $[\text{R6G}] = 1 \times 10^{-5} \text{ mol}\cdot\text{L}^{-1}$ ).

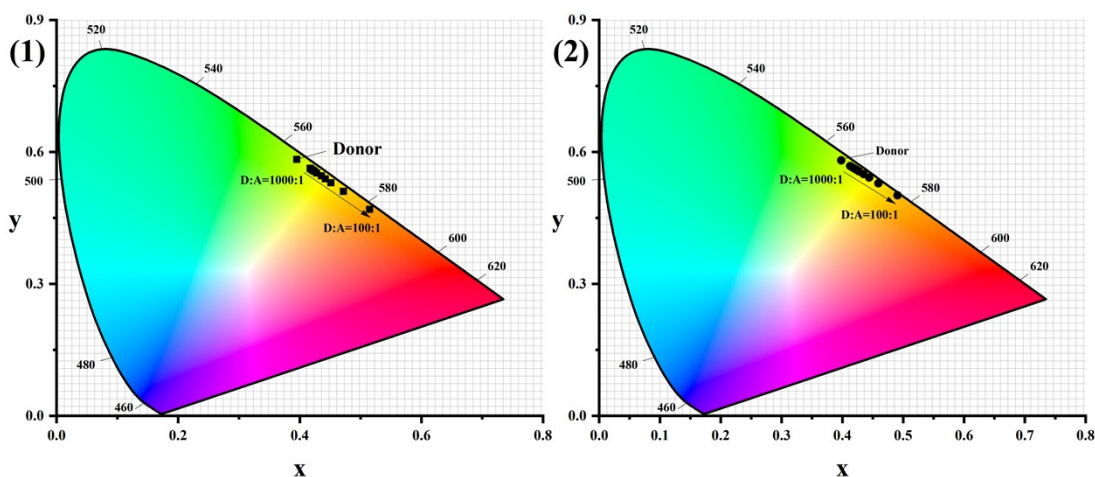

**Fig. S10.** The CIE diagram corresponding to the spectrum of (1) different PVA/PDA organogel/SR101 ratios (left) and (2) different PVA/PDA organogel/R6G ratios (right).

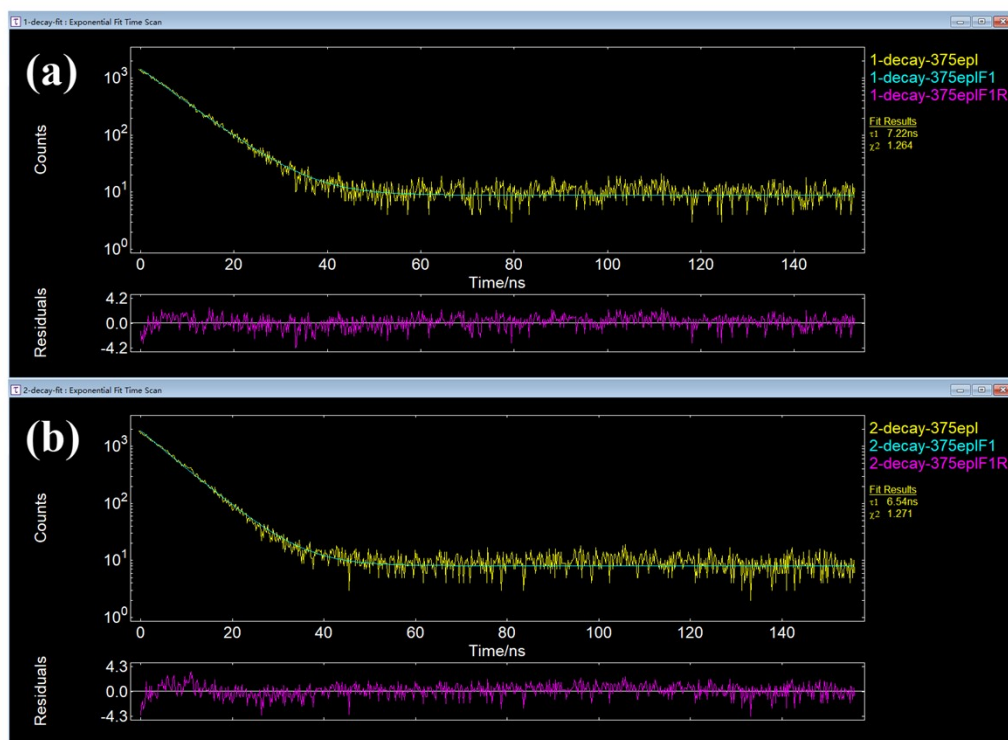

**Fig. S11.** (a) Fluorescence lifetime of PVA/PDA organogel ( $[PDA] = 1.5 \times 10^{-6}$  mol. Monitored at 547 nm upon excitation at 357 nm.). (b) Fluorescence lifetime of PVA/Tmt/AYG organogel ( $[PDA] = 1.5 \times 10^{-6}$  mol,  $[SR101] = 1.5 \times 10^{-8}$  mol. Monitored at 547 nm upon excitation at 357 nm.).

**Table S1.** Fluorescence lifetimes of PVA/PDA organogel, PVA/PDA/SR101 organogel ( $[PDA] = 1.5 \times 10^{-6}$  mol,  $[SR101] = 1.5 \times 10^{-8}$  mol, respectively).

| Sample                  | $\tau_1/\text{ns}$ | $RW_1[\%]$ | $\tau/\text{ns}$ | $\chi^2$ |
|-------------------------|--------------------|------------|------------------|----------|
| PVA/PDA organogel       | 7.2                | 100        | 7.2              | 1.264    |
| PVA/PDA/SR101 organogel | 6.5                | 100        | 6.5              | 1.271    |



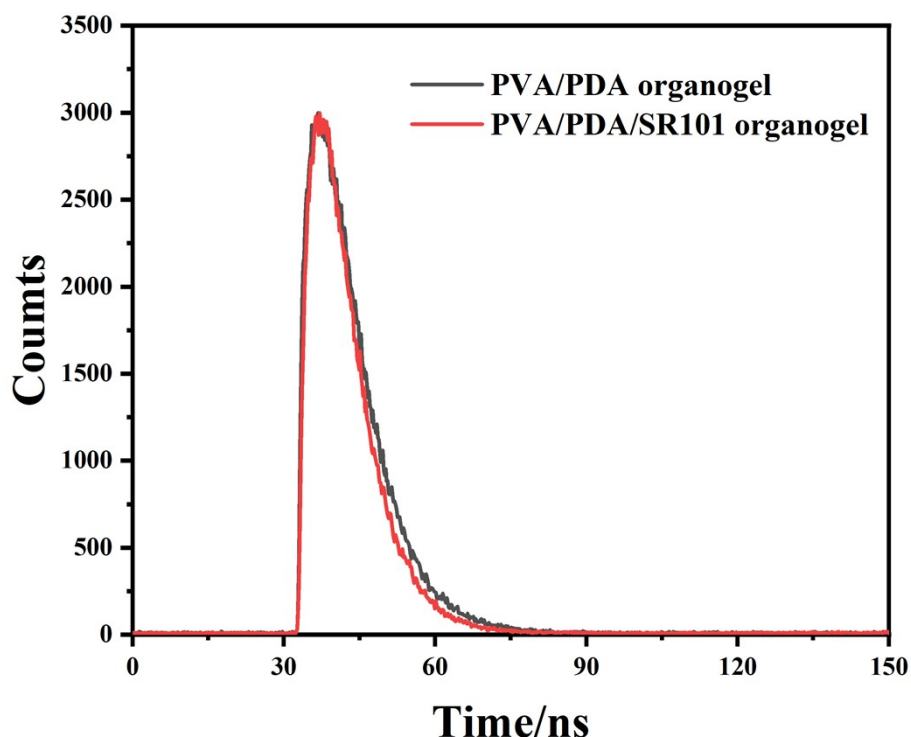

**Fig. S12.** Fluorescence decay profiles of PVA/PDA organogel (black line, [PDA] =  $1.5 \times 10^{-6}$  mol, Monitored at 547 nm upon excitation at 357 nm.) and PVA/PDA/SR101 organogel assembly (red line, [PDA] =  $1.5 \times 10^{-6}$  mol, [SR101] =  $1.5 \times 10^{-8}$  mol, Monitored at 547 nm upon excitation at 357 nm.).

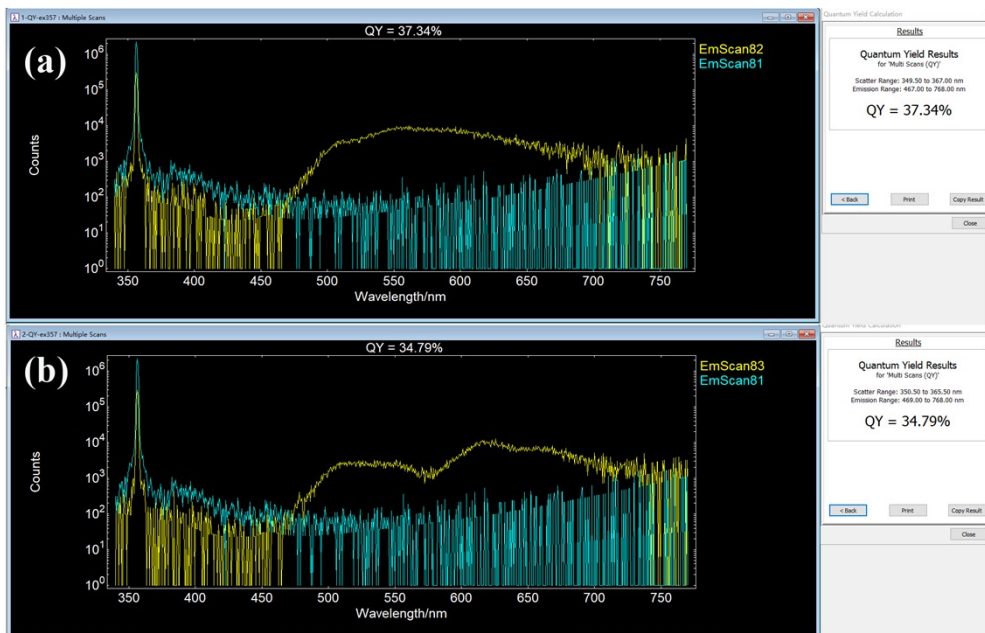

**Fig. S13.** (a) Quantum yield diagram of PVA/PDA organogel with luminescence range of 450–770 nm; (b) Quantum yield diagram of PVA/PDA/SR101 organogel with luminescence range of 574–770 nm ([PDA] =  $1.5 \times 10^{-6}$  mol, [SR101] =  $1.5 \times 10^{-8}$  mol).

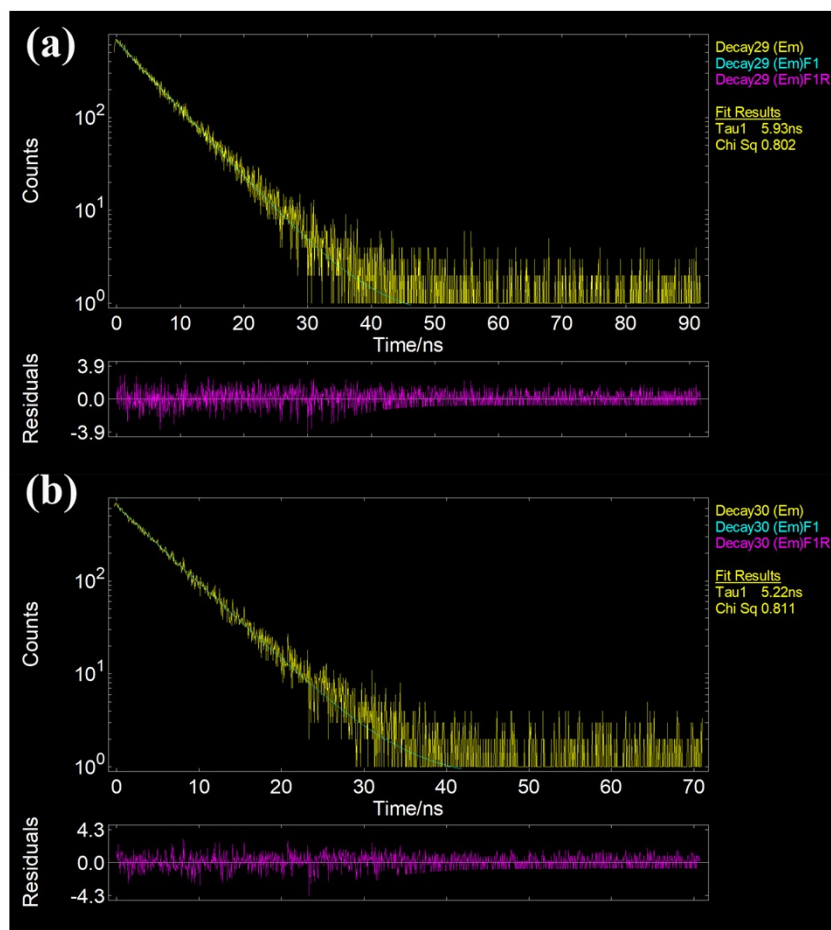

**Fig. S14.** (a) Fluorescence lifetime of PVA/PDA organogel ( $[PDA] = 1.5 \times 10^{-6}$  mol. Monitored at 547 nm upon excitation at 357 nm.). (b) Fluorescence lifetime of PVA/Tmt/R6G organogel ( $[PDA] = 1.5 \times 10^{-6}$  mol,  $[R6G] = 1.5 \times 10^{-8}$  mol. Monitored at 547 nm upon excitation at 357 nm.).

**Table S2.** Fluorescence lifetimes of PVA/PDA organogel, PVA/PDA/R6G organogel ( $[PDA] = 1.5 \times 10^{-6}$  mol,  $[R6G] = 1.5 \times 10^{-8}$  mol, respectively).

| Sample                | $\tau_1/\text{ns}$ | $RW_1[\%]$ | $\tau/\text{ns}$ | $\chi^2$ |
|-----------------------|--------------------|------------|------------------|----------|
| PVA/PDA organogel     | 5.9                | 100        | 5.9              | 0.802    |
| PVA/PDA/R6G organogel | 5.2                | 100        | 5.2              | 0.811    |

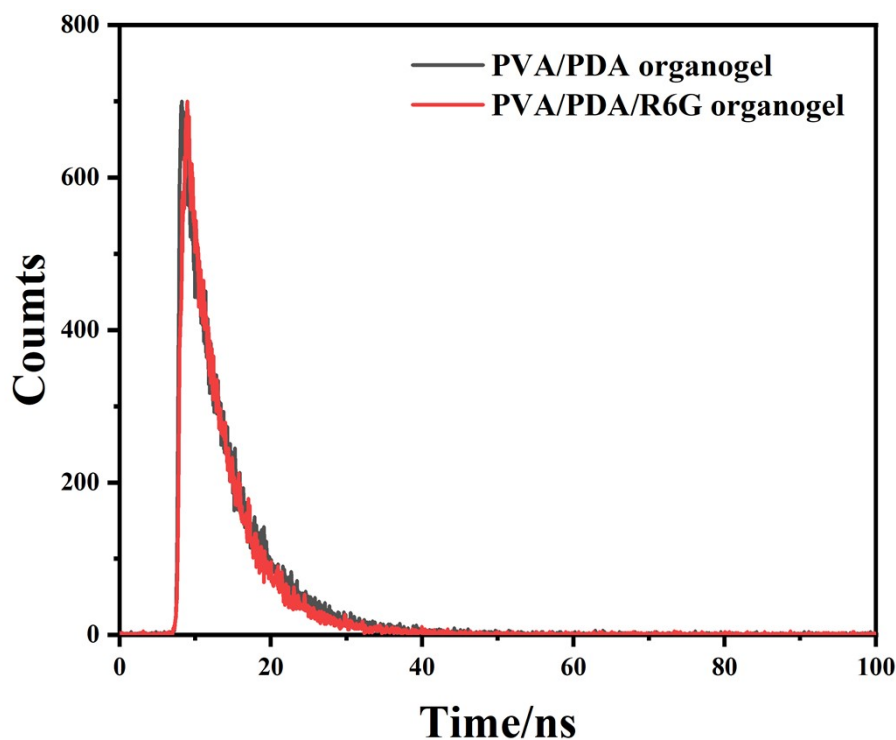

**Fig. S15.** Fluorescence decay profiles of PVA/PDA organogel (black line, [PDA] =  $1.5 \times 10^{-6}$  mol, Monitored at 547 nm upon excitation at 357 nm.) and PVA/PDA/R6G organogel assembly (red line, [PDA] =  $1.5 \times 10^{-6}$  mol, [R6G] =  $1.5 \times 10^{-8}$  mol, Monitored at 547 nm upon excitation at 357 nm.).

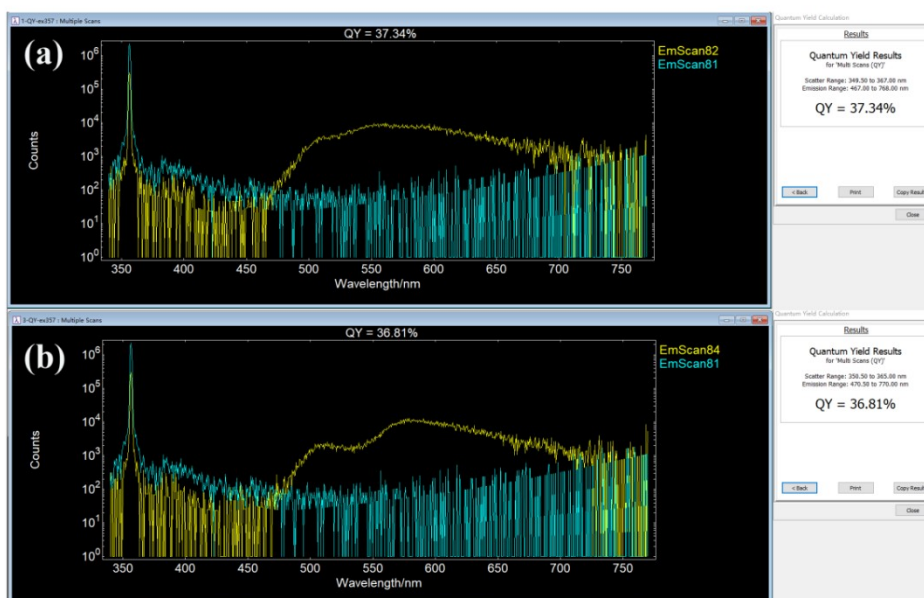

**Fig. S16.** (a) Quantum yield diagram of PVA/PDA organogel with luminescence range of 450–770 nm; (b) Quantum yield diagram of PVA/PDA/R6G organogel with luminescence range of 532–770 nm. ([PDA] =  $1.5 \times 10^{-6}$  mol, [R6G] =  $1.5 \times 10^{-8}$  mol.)

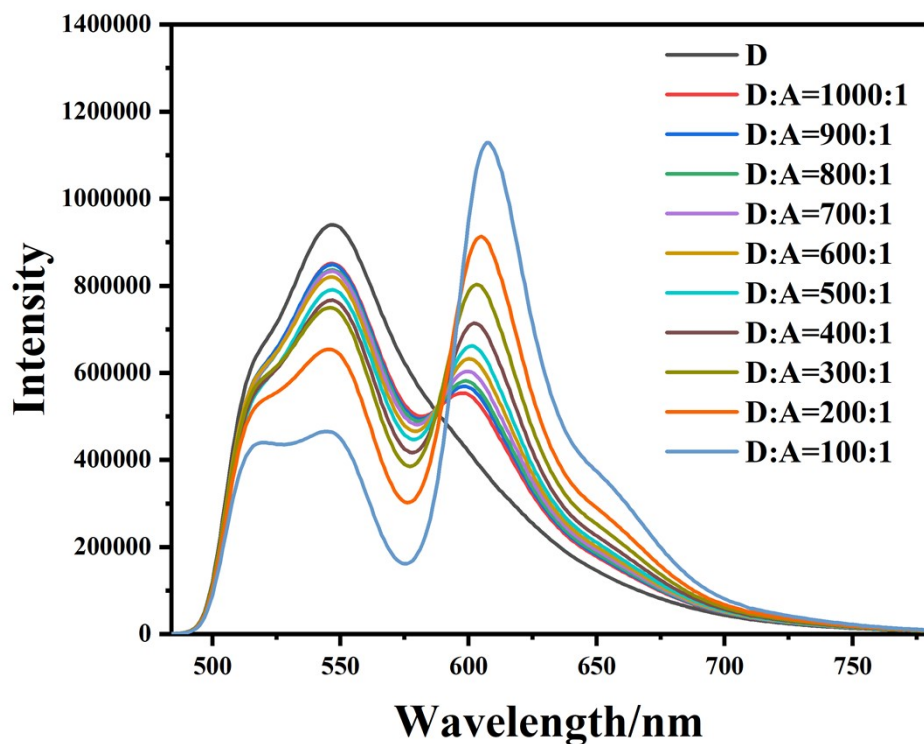

**Fig. S17.** Fluorescence spectra of PVA/PDA-SR101 in the DMSO and DMF binary solven with different content of SR101. (100:1, [PDA] =  $1.5 \times 10^{-6}$  mol, [SR101] =  $1.5 \times 10^{-8}$  mol, and  $\lambda_{\text{ex}} = 357$  nm)

Energy-transfer efficiency ( $\Phi_{\text{ET}}$ ) was calculated from spectra using equation S1.

$$\Phi_{\text{ET}} = 1 - I_{\text{DA},357}/I_{\text{D},357} \text{ (eq. S1)}^{1-3}$$

Where  $I_{\text{DA}}$  and  $I_{\text{D}}$  are the fluorecence intensities of the excitation of PVA/PDA-SR101 assembly (donor and acceptor) and PDA assembly (donor), respectively at 357 nm.

The highest  $\Phi_{\text{ET}}$  value was calculated as 50.72% in solvent, measured under the condition of [PDA] =  $1.5 \times 10^{-6}$  mol, [SR101] =  $1.5 \times 10^{-8}$  mol, and  $\lambda_{\text{ex}} = 357$  nm.

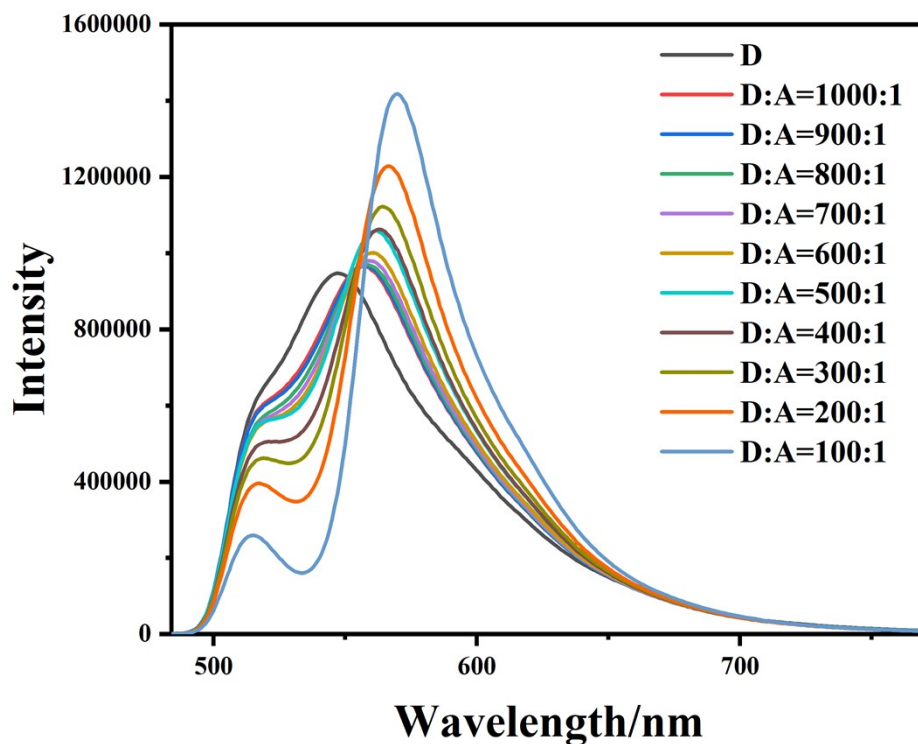

**Fig. S18.** Fluorescence spectra of PVA/PDA-R6G in the DMSO and DMF binary solven with different content of R6G. (100:1, [PDA] =  $1.5 \times 10^{-6}$  mol, [R6G] =  $1.5 \times 10^{-8}$  mol, and  $\lambda_{\text{ex}} = 357$  nm)

Energy-transfer efficiency ( $\Phi_{\text{ET}}$ ) was calculated from spectra using equation S1.

$$\Phi_{\text{ET}} = 1 - I_{\text{DA},357}/I_{\text{D},357} \text{ (eq. S1)}^{1-3}$$

Where  $I_{\text{DA}}$  and  $I_{\text{D}}$  are the fluorecence intensities of the excitation of PVA/PDA-R6G assembly (donor and acceptor) and PDA assembly (donor), respectively at 357 nm.

The highest  $\Phi_{\text{ET}}$  value was calculated as 61.37% in solvent, measured under the condition of [PDA] =  $1.5 \times 10^{-6}$  mol, [R6G] =  $1.5 \times 10^{-8}$  mol, and  $\lambda_{\text{ex}} = 357$  nm.

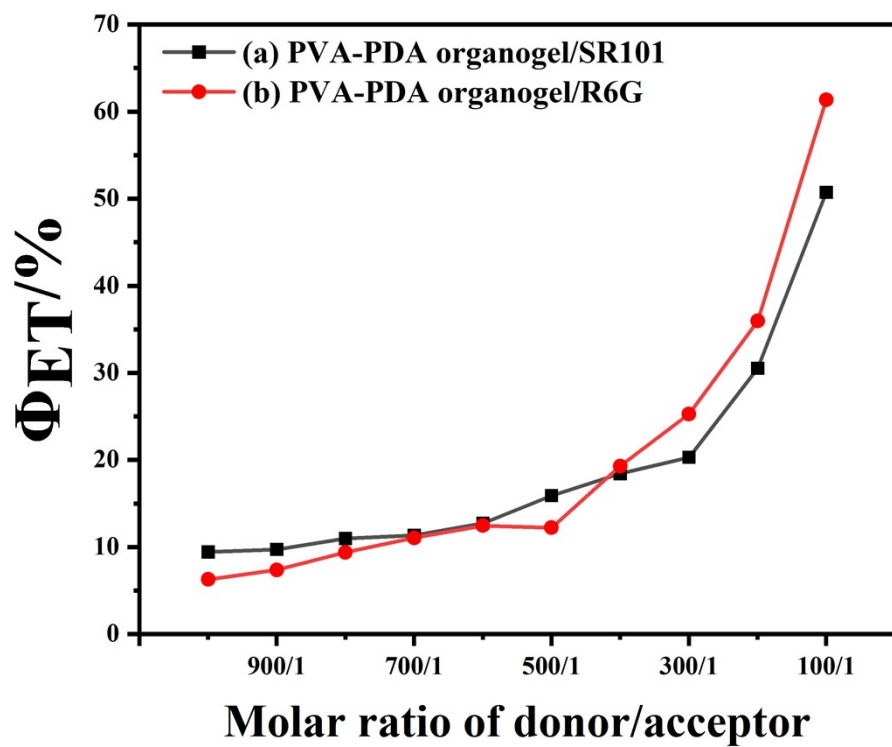

**Fig. S19.** Line chart of energy transfer efficiency of PVA/PDA/SR101 and PVA/PDA/R6G organogel at different proportions

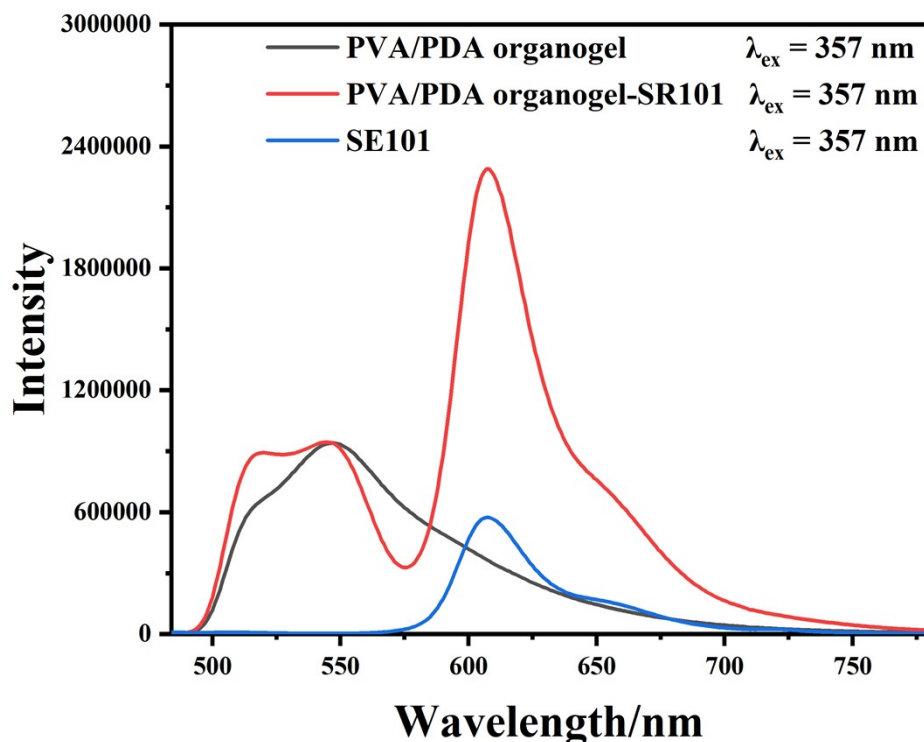

**Fig. S20.** Red line: Fluorescence spectra of PVA/PDA-SR101 in the DMSO and DMF binary solven, which was normalized according to the fluorescence intensity at 547 nm of the black line. ( $\lambda_{\text{ex}} = 357 \text{ nm}$ ) ( $[\text{PDA}] = 1.5 \times 10^{-6} \text{ mol}$ ,  $[\text{SR101}] = 1.5 \times 10^{-8} \text{ mol.}$ ); the black line represents the fluorescence spectrum of PVA/Tmt.

The antenna effect (AE) was calculated based on the excitation spectra using equation S3.

$$\text{AE} = (I_{\text{DA},357} - I_{\text{D},357}) / I_{\text{A},357} \text{ (eq. S3)}$$

Where  $I_{\text{DA},357}$  and  $I_{\text{DA},357}$  are the fluorescence intensities at 608 nm with the excitation of the donor at 357 nm and the direct excitation of the acceptor at 357 nm, respectively.  $I_{\text{D},357}$  is the fluorescence intensities at 608 nm of the PVA/PDA assembly, which was normalized with the PVA/PDA-SR101 assembly at 547 nm.

The antenna effect value was calculated as 3.3468 in the DMSO and DMF binary solven, measured under the condition of  $[\text{PDA}] = 1.5 \times 10^{-6} \text{ mol}$ ,  $[\text{SR101}] = 1.5 \times 10^{-8} \text{ mol.}$

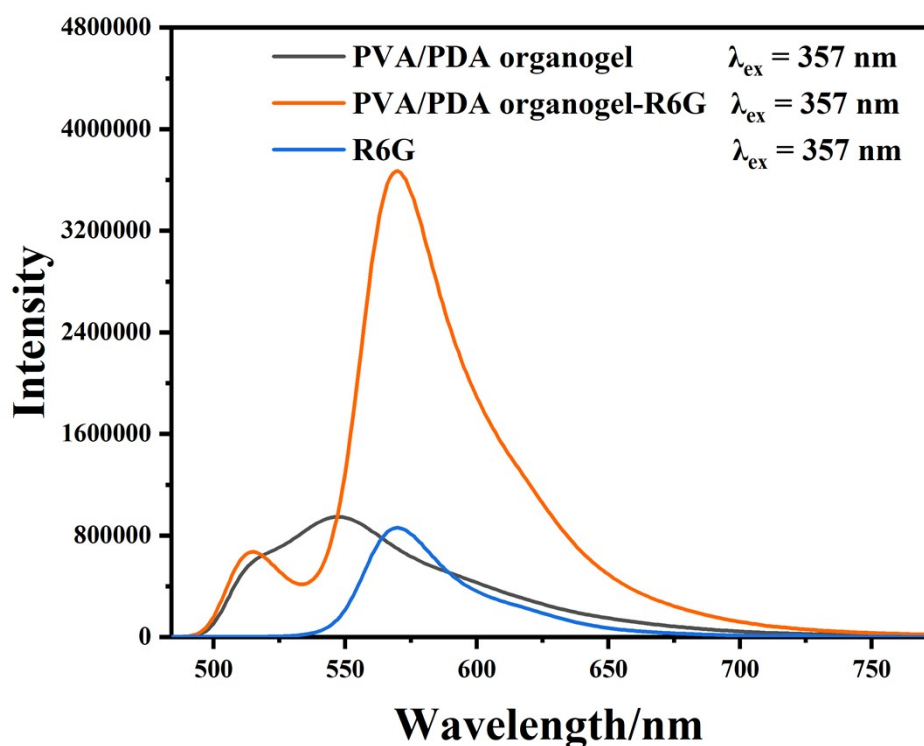

**Fig. S21.** Orange line: Fluorescence spectra of PVA/PDA-R6G in the DMSO and DMF binary solven, which was normalized according to the fluorescence intensity at 547 nm of the black line. ( $\lambda_{\text{ex}} = 357 \text{ nm}$ ) ( $[\text{PDA}] = 1.5 \times 10^{-6} \text{ mol}$ ,  $[\text{R6G}] = 1.5 \times 10^{-8} \text{ mol}$ .); the black line represents the fluorescence spectrum of PVA/PDA.

The antenna effect (AE) was calculated based on the excitation spectra using equation S3.

$$\text{AE} = (I_{\text{DA},357} - I_{\text{D},357}) / I_{\text{A},357} \text{ (eq. S3)}$$

Where  $I_{\text{DA},357}$  and  $I_{\text{D},357}$  are the fluorescence intensities at 570 nm with the excitation of the donor at 357 nm and the direct excitation of the acceptor at 357 nm, respectively.  $I_{\text{D},357}$  is the fluorescence intensities at 570 nm of the PVA/PDA assembly, which was normalized with the PVA/PDA-R6G assembly at 547 nm.

The antenna effect value was calculated as 3.4564 in the DMSO and DMF binary solven, measured under the condition of  $[\text{PDA}] = 1.5 \times 10^{-6} \text{ mol}$ ,  $[\text{R6G}] = 1.5 \times 10^{-8} \text{ mol}$ .



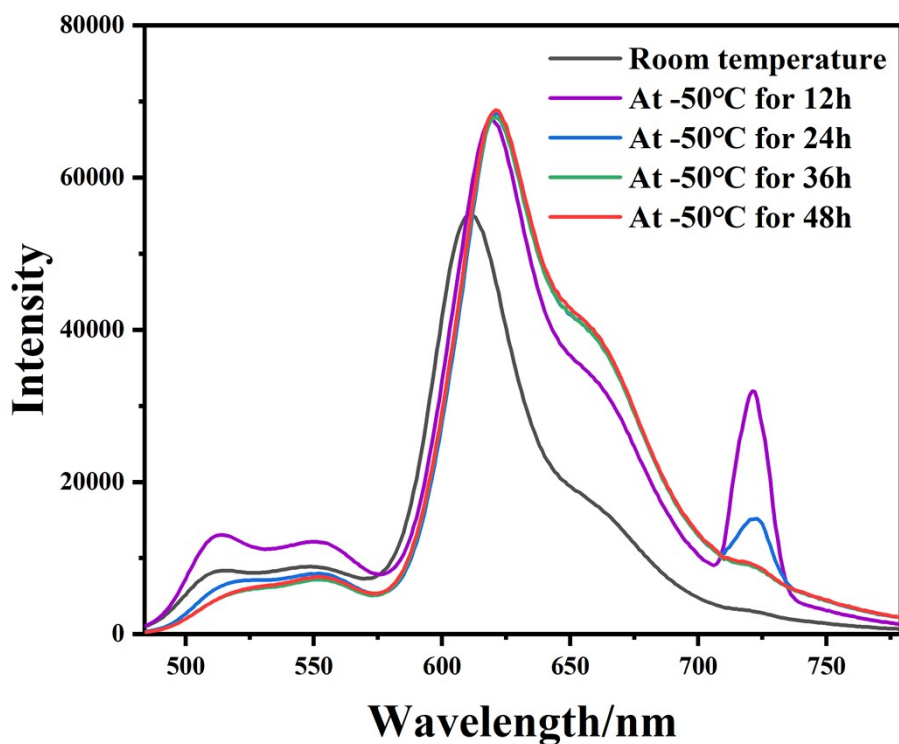

**Fig. S22.** Fluorescence spectra of PVA/PDA-SR101 in the DMSO and DMF binary solven at different temperature ( $\lambda_{\text{ex}} = 357 \text{ nm}$ ) ( $[\text{PDA}] = 1.5 \times 10^{-6} \text{ mol}$ ,  $[\text{SR101}] = 1.5 \times 10^{-8} \text{ mol}$ .)

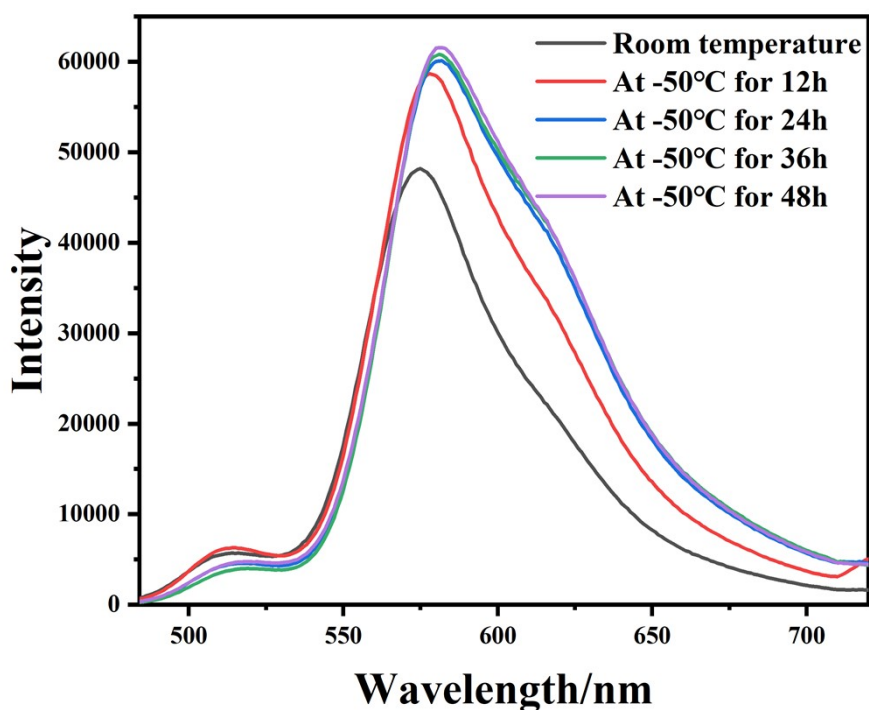

**Fig. S23.** Fluorescence spectra of PVA/PDA-R6G in the DMSO and DMF binary solven at different temperature ( $\lambda_{\text{ex}} = 357 \text{ nm}$ ) ( $[\text{PDA}] = 1.5 \times 10^{-6} \text{ mol}$ ,  $[\text{R6G}] = 1.5 \times 10^{-8} \text{ mol}$ .)

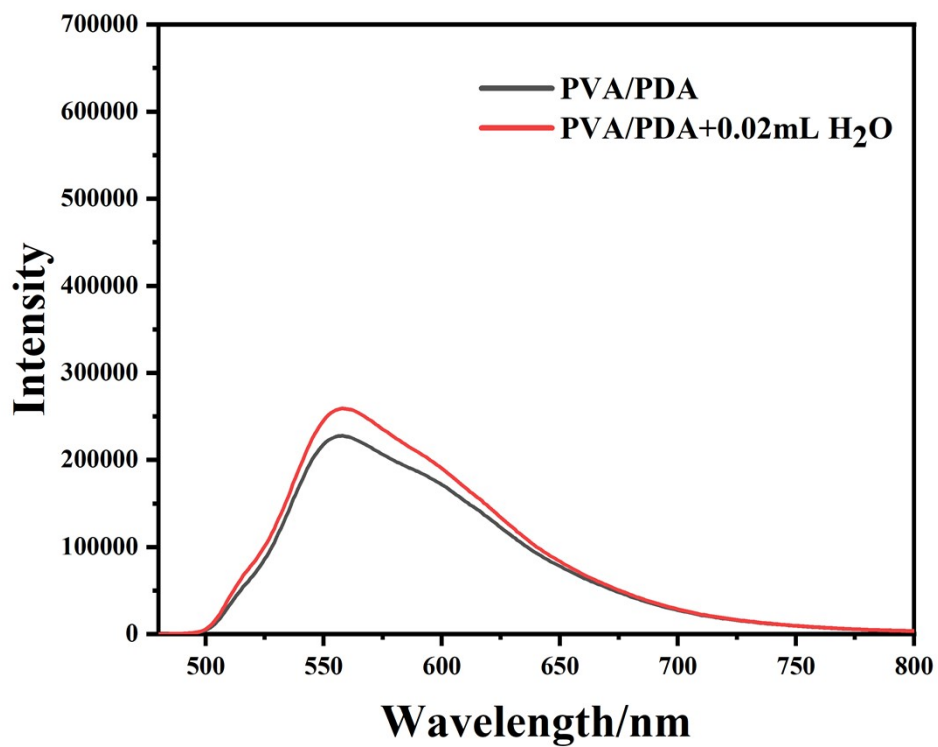

**Fig. S24.** Effect of 0.02 mL of water on fluorescence spectra of PVA/PDA

## References

- (1) R. Gao and D. Yan, *Chem. Sci.*, 2017, **8**, 590–599.
- (2) S. Guo, Y. Song, Y. He, X. Hu and L. Wang, *Angew. Chem. Int. Ed.*, 2018, **57**, 3163–3167.
- (3) M. Hao, G. Sun, M. Zuo, Z. Xu, Y. Chen, X. Hu and L. Wang, *Angew. Chem. Int. Ed.*, 2020, **59**, 10095–10100.
